# Supplementary material for: Enhanced stability and optoelectronic properties of MAPbI3 films by a cationic surface-active agent for perovskite solar cells
Source: Royal Society of Chemistry journal article supplement (doi:10.1039/c8ta00457a), 2018-01-01
Supplement: c8ta00457a1.pdf [file c8ta00457a1.pdf]

## Supporting Information

### Enhanced stability and optoelectronic properties of MAPbI<sub>3</sub> films with cationic surface active agent for perovskite solar cells

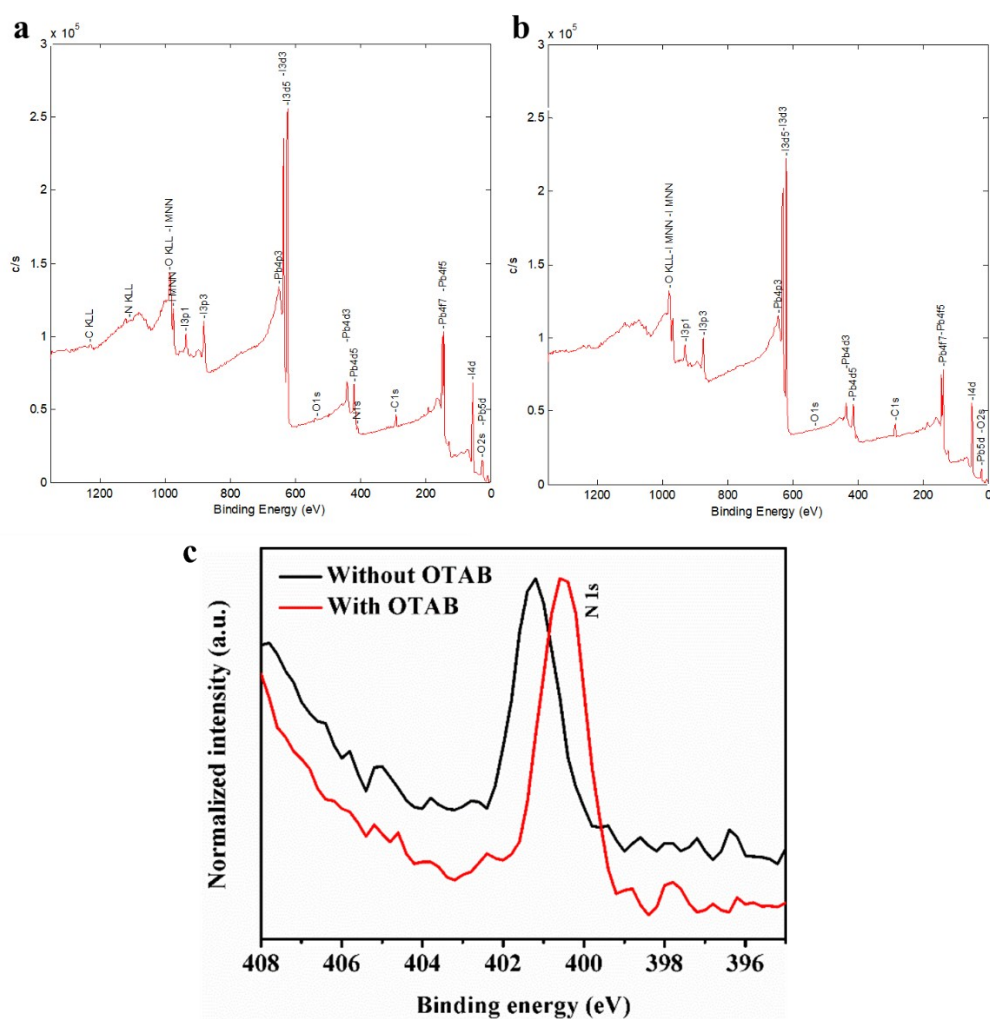

**Figure S1.** (a) Full XPS spectra of MAPbI<sub>3</sub> films without OTAB modified. (b) Full XPS spectra of MAPbI<sub>3</sub> films with OTAB modified. (c) N 1s XPS spectra of MAPbI<sub>3</sub> films with and without OTAB modified.

**Table S1.** The relative contents of elements on the surface of perovskite films measured by XPS.

| Sample                          | C (%) | N (%) | Pb (%) | I (%) | O (%) |
|---------------------------------|-------|-------|--------|-------|-------|
| MAPbI <sub>3</sub> without OTAB | 35.44 | 10.14 | 15.81  | 36.27 | 2.34  |
| MAPbI <sub>3</sub> with OTAB    | 45.38 | 10.98 | 11.35  | 30.59 | 1.69  |

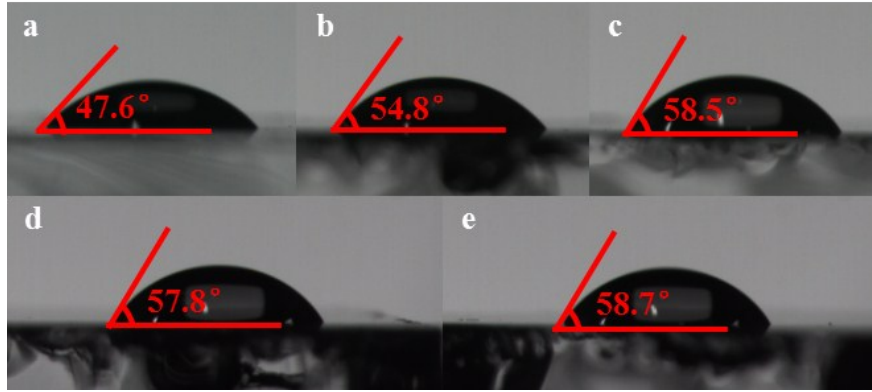

**Figure S2.** The static contact angles between MAPbI<sub>3</sub> films with adding (a) 0 mg/mL, (b) 0.1 mg/mL, (c) 0.5 mg/mL, (d) 1 mg/mL, (e) 3 mg/mL OTAB additive and deionized water.

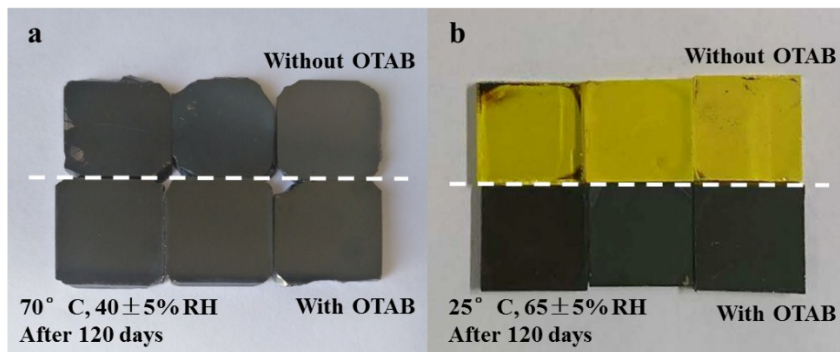

**Figure S3.** Photographs of MAPbI<sub>3</sub> films aging for 120 days under (a) 70°C, 40±5% relative humidity and (b) 25°C, 65±5% relative humidity.

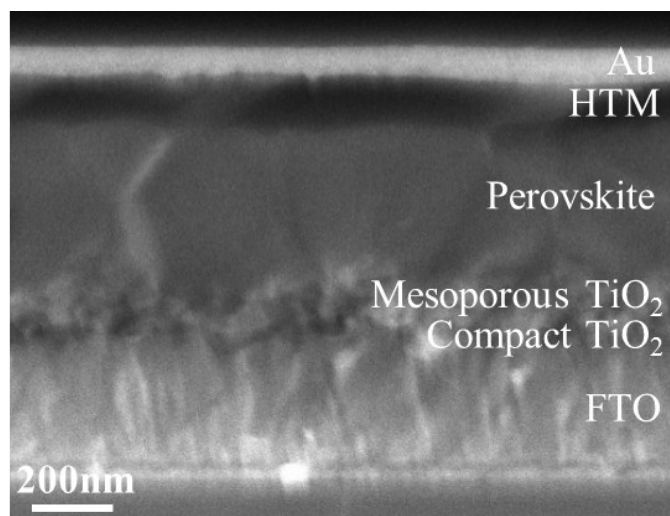

**Figure S4.** The cross sectional SEM image of perovskite solar cell with 0.5 mg mL<sup>-1</sup> OTAB modified.

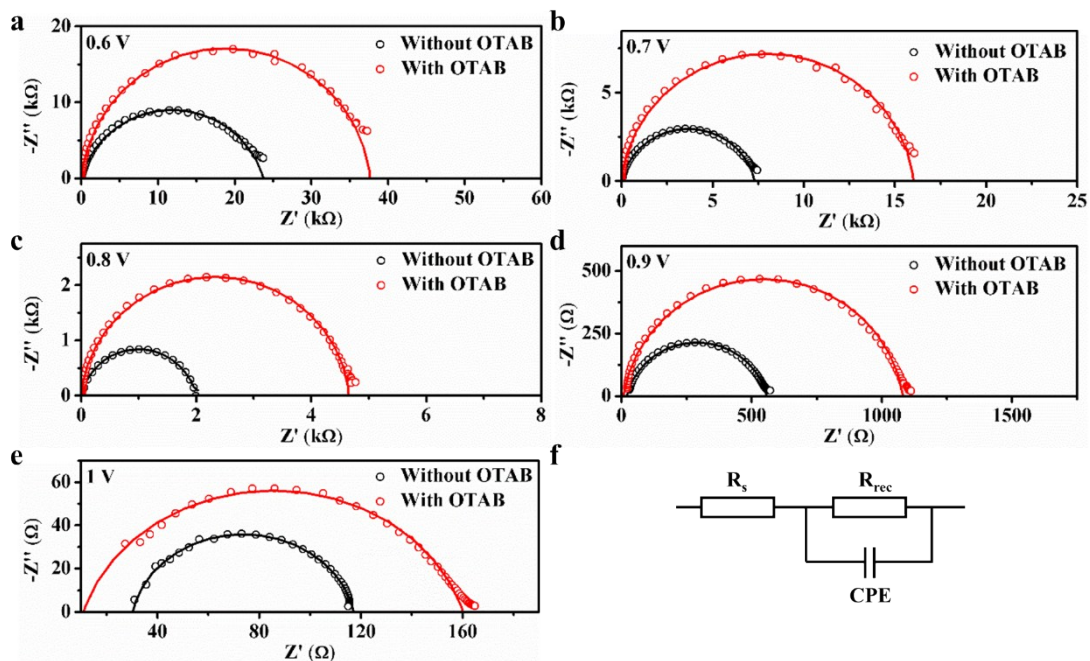

**Figure S5.** Nyquist plots of the PSCs measured in the dark with different bias voltage. (a) 0.6V; (b) 0.7V; (c) 0.8V; (d) 0.9V; (e) 1V. (f) Simplified equivalent circuit.

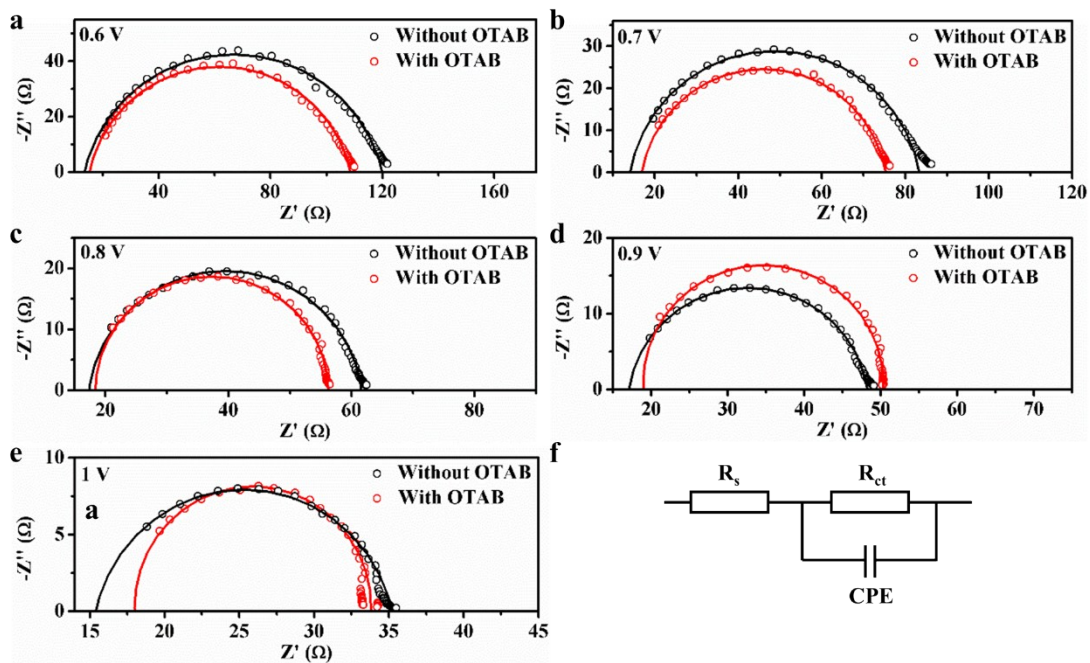

**Figure S6.** Nyquist plots of the PSCs measured under 1 sun light illumination with different bias voltage. (a) 0.6V; (b) 0.7V; (c) 0.8V; (d) 0.9V; (e) 1V. (f) Simplified equivalent circuit.

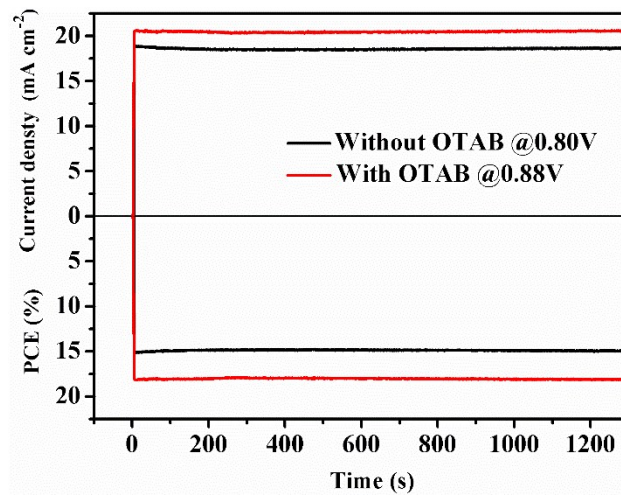

Figure S7. Stabilized current density and PCE at the maximum power point.

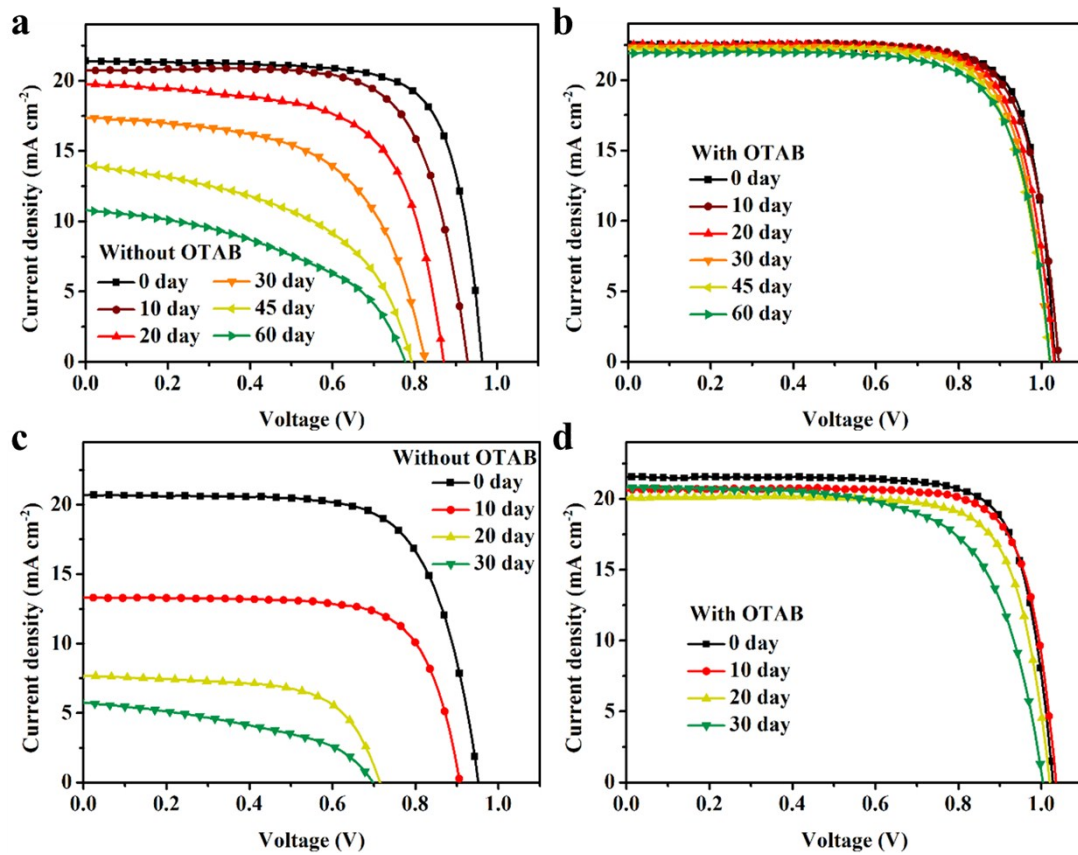

Figure S8. The evolution of J-V curves of PSCs without and with OTAB modified under (a, b) 70°C, 40±5% relative humidity for 60 days and (c, d) 25°C, 75±5% relative humidity for 30 days.
